# Supplementary material for: Cancer cell membrane-derived nanoparticles improve the activity of gemcitabine and paclitaxel on pancreatic cancer cells and coordinate immunoregulatory properties on professional antigen-presenting cells
Source: Royal Society of Chemistry journal article supplement (doi:10.1039/d0ma00367k), 2020-01-01
Supplement: d0ma00367k1.pdf [file d0ma00367k1.pdf]

1 **Supporting Information:** Cancer cell membrane-derived nanoparticles improve the  
2 activity of gemcitabine and paclitaxel on pancreatic cancer cells and coordinate  
3 immunoregulatory properties on professional antigen-presenting cells.

4  
5  
6

7 Edson J. Comparetti<sup>1</sup>, Paula M. P. Lins <sup>1</sup>, João Quitiba<sup>1</sup>, Valtencir Zucolotto<sup>1</sup>

8 <sup>1</sup>Nanomedicine and Nanotoxicology Group, Physics Institute of São Carlos, University  
9 of São Paulo, São Carlos, SP, Brazil.

10

11 Corresponding author: Valtencir Zucolotto, Nanomedicine and Nanotoxicology Group,  
12 Physics Institute of São Carlos, University of São Paulo,; São Carlos, SP, Brazil.

13  
14  
15  
16  
17  
18

## 19 **AUTHOR INFORMATION**

### 20 **Corresponding Authors**

21 \*E-mail: [zucolotto@usp.br](mailto:zucolotto@usp.br)

22 \*E-mail: [edsoncomparetti@usp.br](mailto:edsoncomparetti@usp.br)

### 23 **ORCID**

24 Edson J. Comparetti: 0000-0001-8390-3966

25 Paula M. P. Lins: 0000-0002-8663-4463

26

27 Valtencir Zucolotto: 0000-0003-4307-3077

28  
29

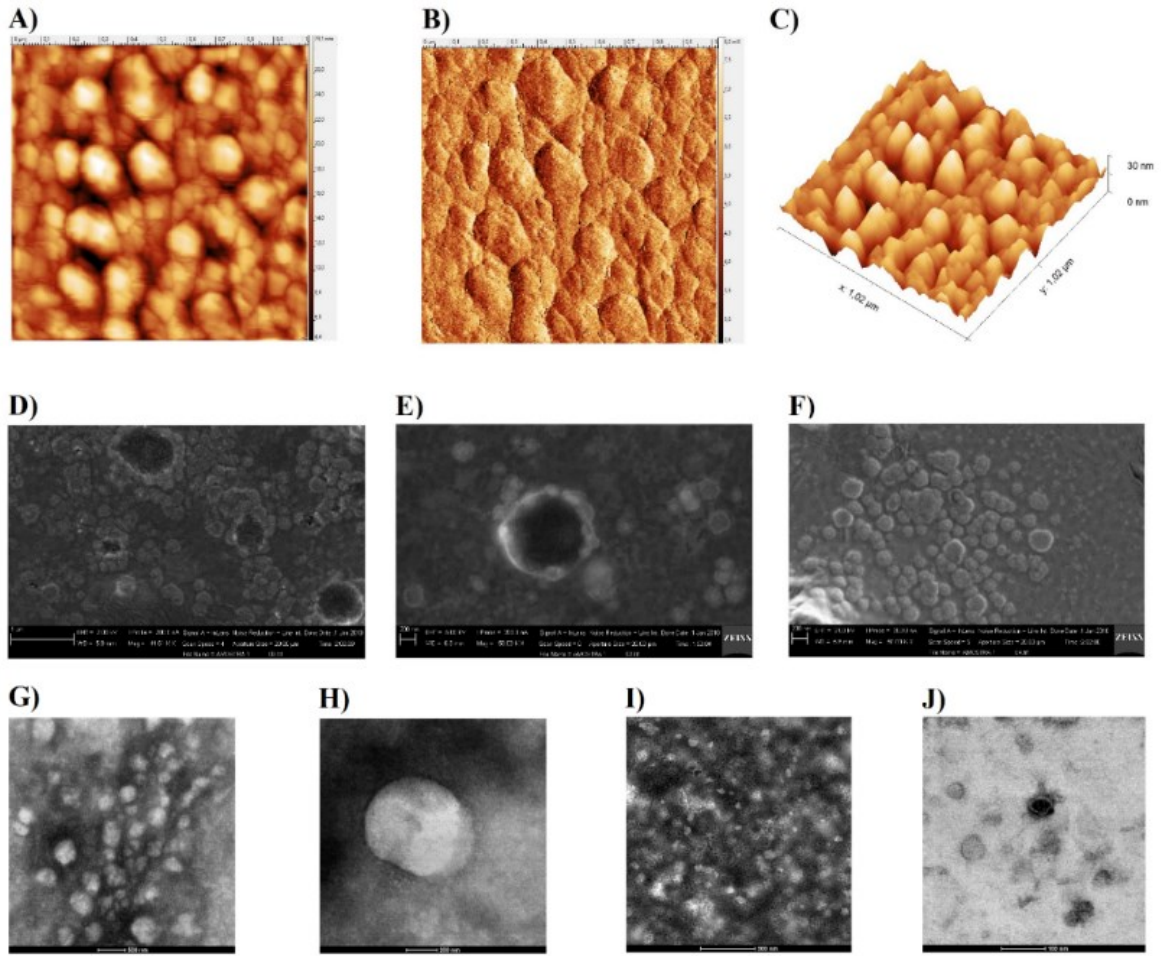

1  
 2 Fig. S1. Image of plasma membrane nanoparticles (MNPs) extracted from the cancer cell  
 3 by AFM, with reconstruction of Z-axis (a), amplitude (b), and three-dimensional (3-D)  
 4 (c) images. FEG-MEV (d-f) and TEM (g-j) analysis at different magnifications, with  
 5 scale bar at 1 μm and 200 nm.

6  
 7  
 8

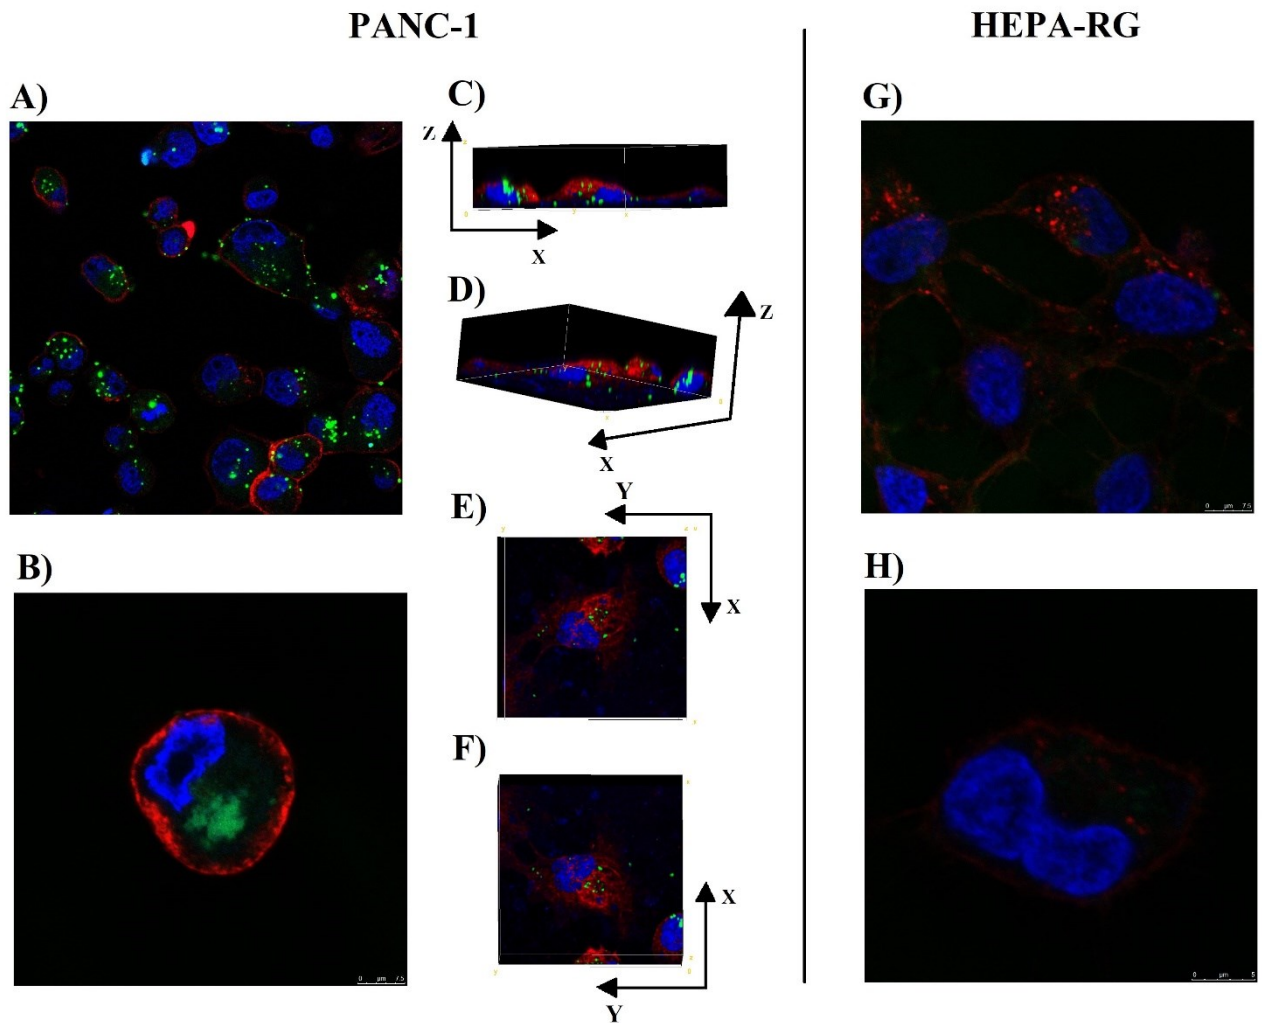

1

2 Fig.S2. Confocal microscopy of pancreatic cancer cells (PANC-1) (a and b) after 24h  
 3 exposed to FITC labeled nanoparticles. Incorporation of MNPs-FITC is exhibited by  
 4 green fluorescence in cell cytoplasm while plasma membrane was stained using wheat  
 5 germ agglutinin (WGA) conjugated to Texas Red, and DAPI molecules identified cell  
 6 nucleus. 3D confocal microscopy shows MNPs conjugated with FITC in PANC-1  
 7 cytoplasm and cell membrane (c-f). In hepatic cells (g and h), we observed a reduction in  
 8 the frequency of green signals in HEPA-RG cells.

9

10

11

PANC-1

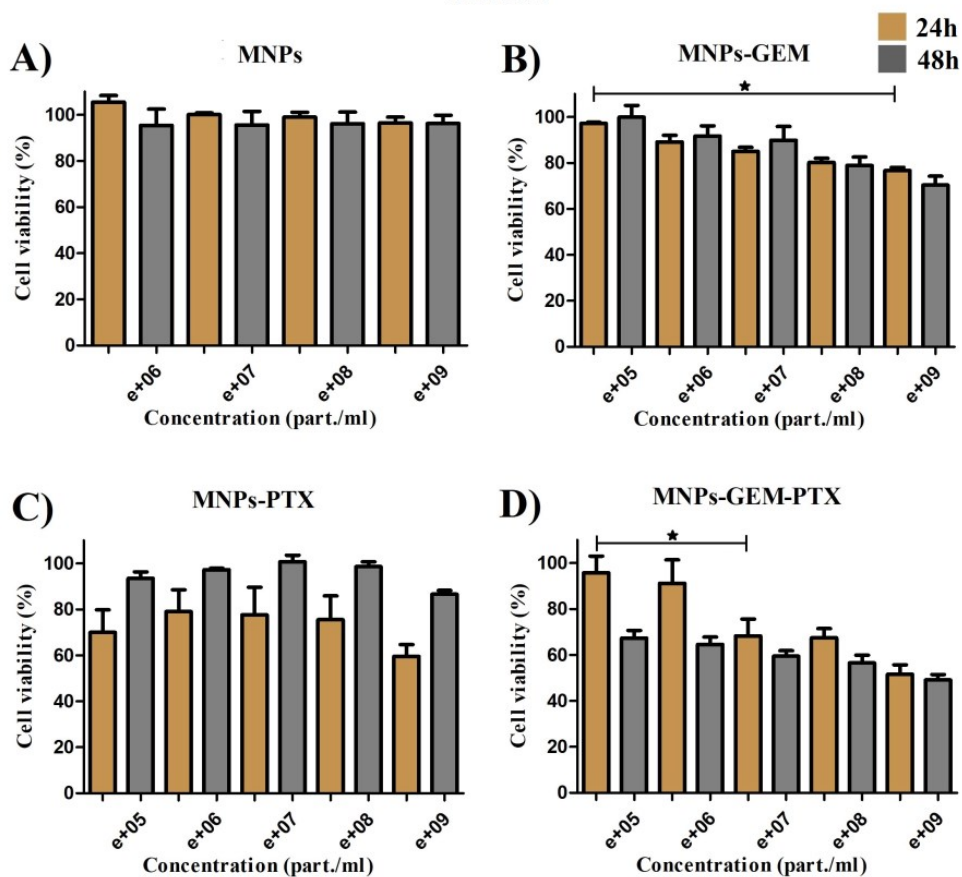

1

2 Fig. S3. Cytotoxicity analysis of MNPs in pancreatic cancer cells (PANC-1) by methyl  
 3 tetrazolium reduction (MTT). PANC-1 ( $1 \times 10^4$  cells per well) was exposed to pure MNPs  
 4 (a), gemcitabine encapsulated in MNPs (MNPs-GEM) (b), paclitaxel in MNPs (MNPs-  
 5 PTX) (c), and MNPs loaded with both drugs (MNPs-GEM-PTX) (d) to verify their  
 6 response and to estimate the working concentration in pancreatic cancer cells (\* $p \leq 0.05$ ).

7

8

## HEPA-RG

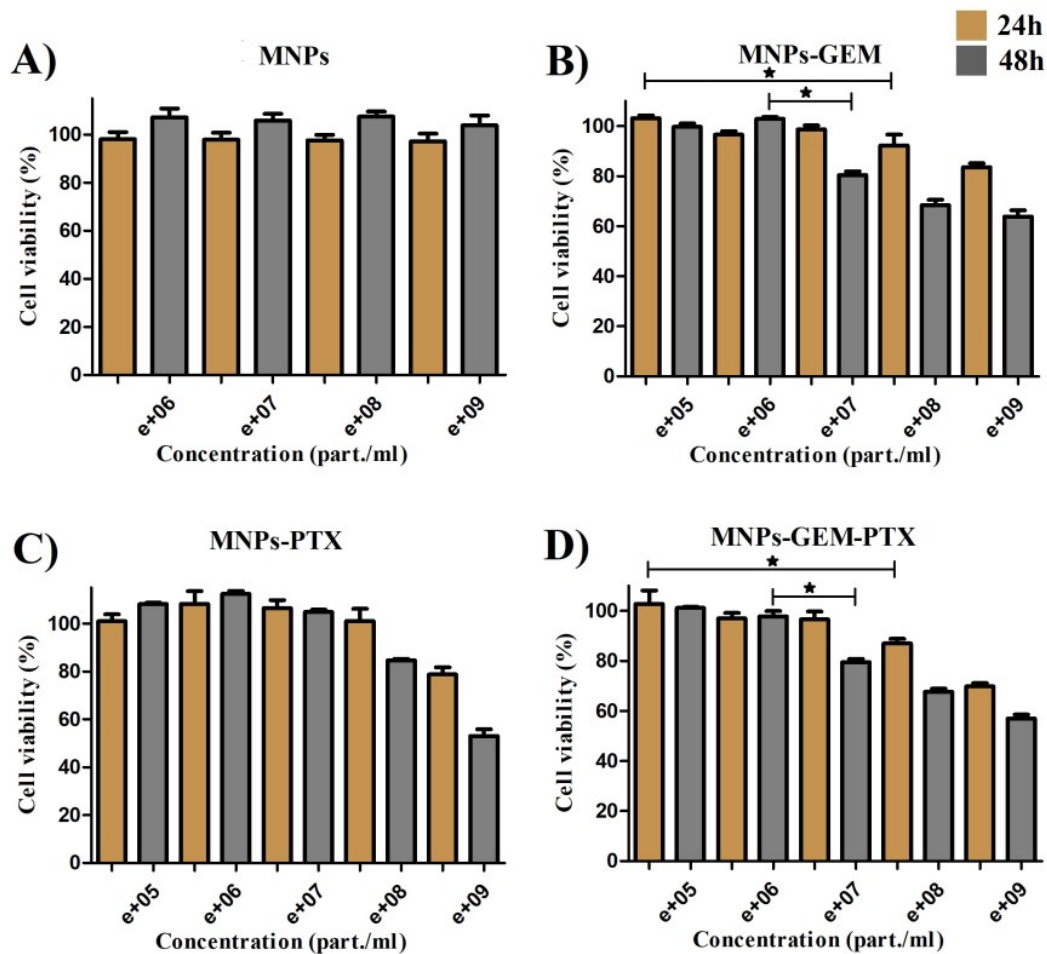

1

2 Fig. S4. Cytotoxicity analysis of MNPs in healthy liver cells (HEPA-RG) by methyl  
 3 tetrazolium reduction (MTT). HEPA-RG ( $1 \times 10^4$  cells per well) was exposed to pure  
 4 MNPs (a), gemcitabine-encapsulated MNPs (MNPs-GEM) (b), paclitaxel in MNPs  
 5 (MNPs-PTX) (c) and MNPs encapsulated with both drugs (MNPs-GEM-PTX) (d) to  
 6 verify their specificity and toxicity in different concentrations of nanoparticles,  
 7 synthesized from the pancreatic membrane, when exposed to healthy cell line (\* $p \leq 0.05$ ).

8

9

10

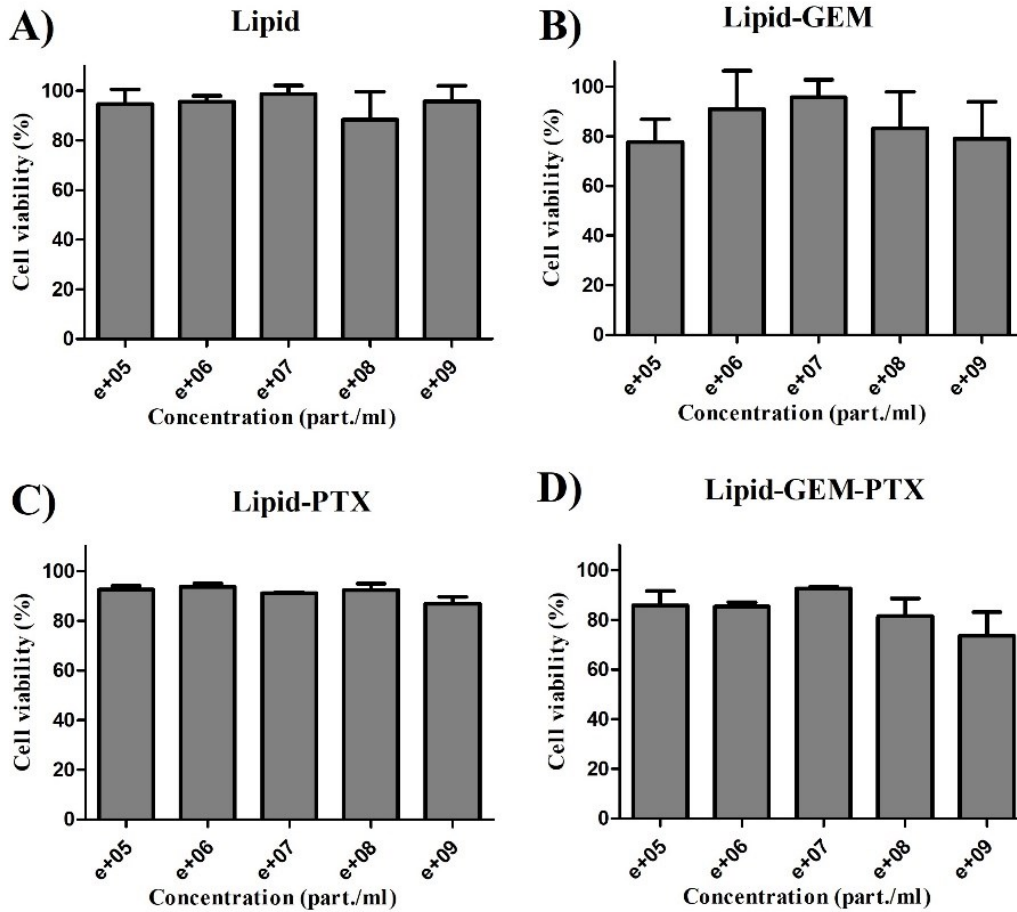

1

2 Fig. S5. Cytotoxicity of synthetic liposomes encapsulated with gemcitabine and paclitaxel  
 3 in pancreatic cancer cells (PANC-1) evaluated by methyl tetrazolium reduction assay  
 4 (MTT). PANC-1 ( $1 \times 10^4$  cells per well) were exposed to different concentrations of bare  
 5 liposomes (a), GEM-encapsulated in liposomes (b), PTX-encapsulated in liposomes (c)  
 6 and liposomes encapsulating both chemotherapeutics (d) to compare synthetic lipid  
 7 nanoparticle activity with MNPs groups.

8

9

10

11

12

13

14

15

16

17

18

19

20

21

22

23

# Monocytes

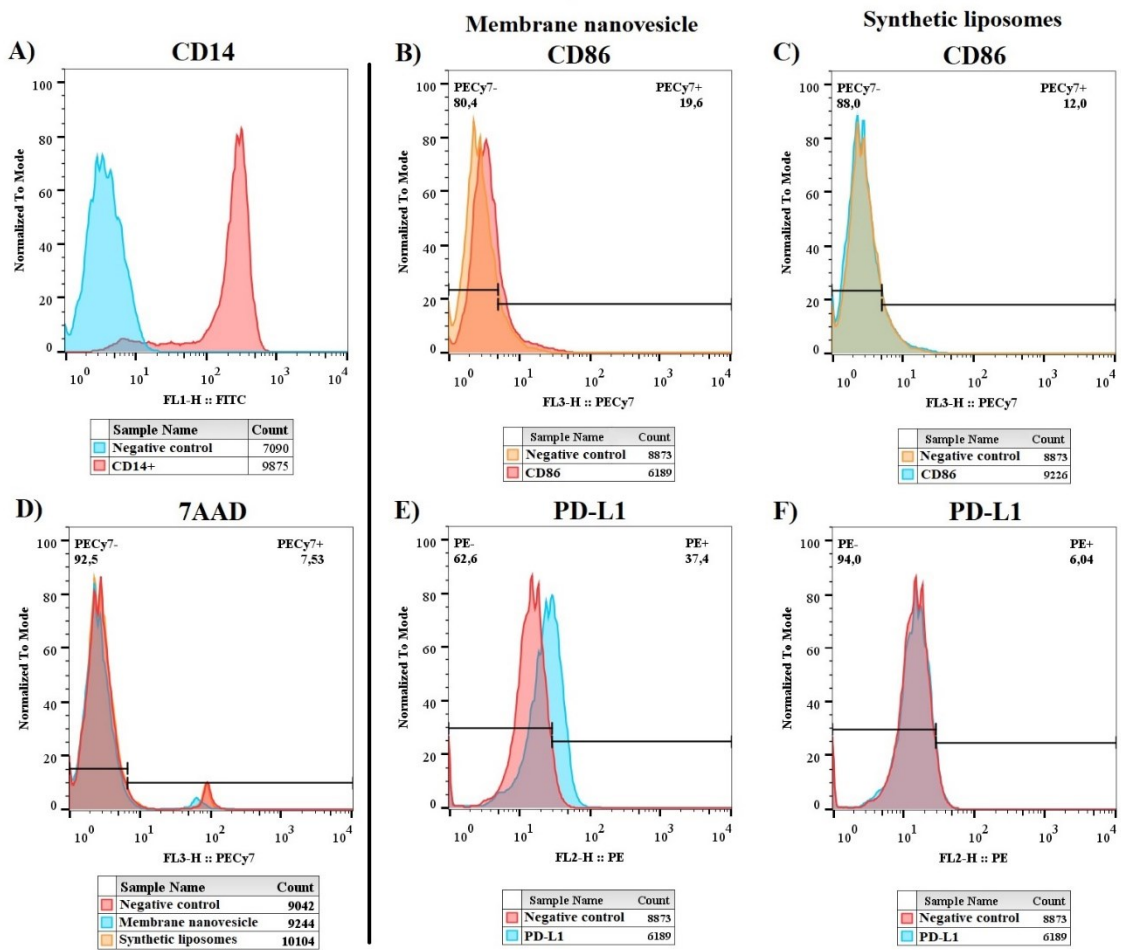

1  
2 Fig. S6. Regulatory effects of MNPs and liposomes on monocyte phenotype. Percentage  
3 of CD14<sup>+</sup> cells (a) expressing CD86 (b and c), and PD-L1 (e and f), and their respective  
4 viability (d).

5  
6  
7  
8  
9  
10  
11  
12  
13  
14  
15  
16  
17  
18  
19  
20  
21  
22  
23  
24

## DCs

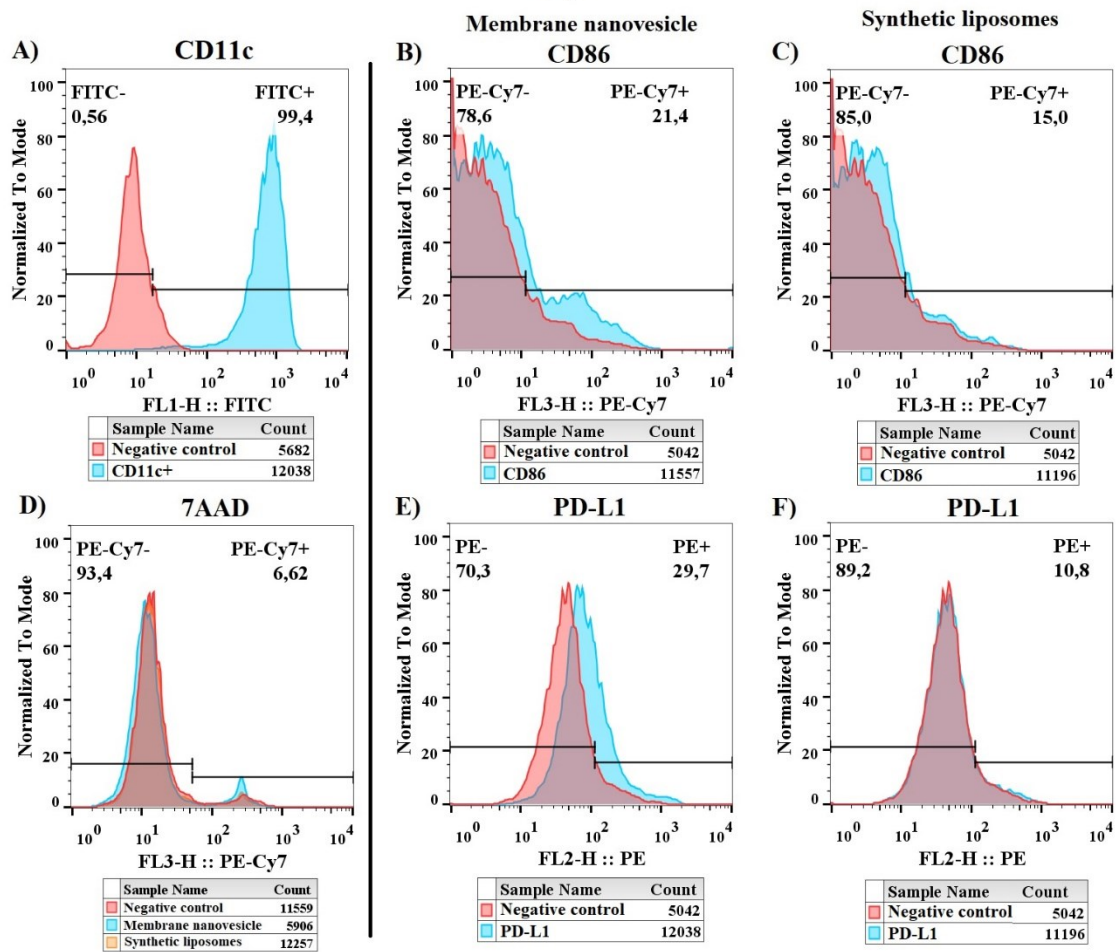

1  
 2 Fig. S7. Regulatory effects of MNPs and liposomes on DCs phenotype. Percentage of  
 3 CD11c<sup>+</sup> cells (a) expressing CD86 (b and c), and PD-L1 (e and f), and their respective  
 4 viability (d).
